# Supplementary material for: Secondary growth synthesis of ZnSn(OH)6cube/Zn2SnO4nanowire yolk–shell hierarchical structures with enhanced lithium ion storage properties
Source: Royal Society of Chemistry journal article supplement (doi:10.1039/c6ce01319h), 2016-01-01
Supplement: c6ce01319h1.pdf [file c6ce01319h1.pdf]

## Supplementary information

### Secondary Growth Synthesis of $\text{ZnSn}(\text{OH})_6$ Cubes/ $\text{Zn}_2\text{SnO}_4$ Nanowires Yolk-shell Hierarchical Structure with Enhanced Lithium Storage Properties

Xia Guo, Mengqin Cai, Rong Li, Xiguang Han\*

Jiangsu Key Laboratory of Green Synthetic Chemistry for Functional Materials,  
Department of Chemistry, School of Chemistry and Chemical Engineering, Jiangsu  
Normal University, Xuzhou, Jiangsu 221116, P. R. China.

E-mail: [xghan@jsnu.edu.cn](mailto:xghan@jsnu.edu.cn)

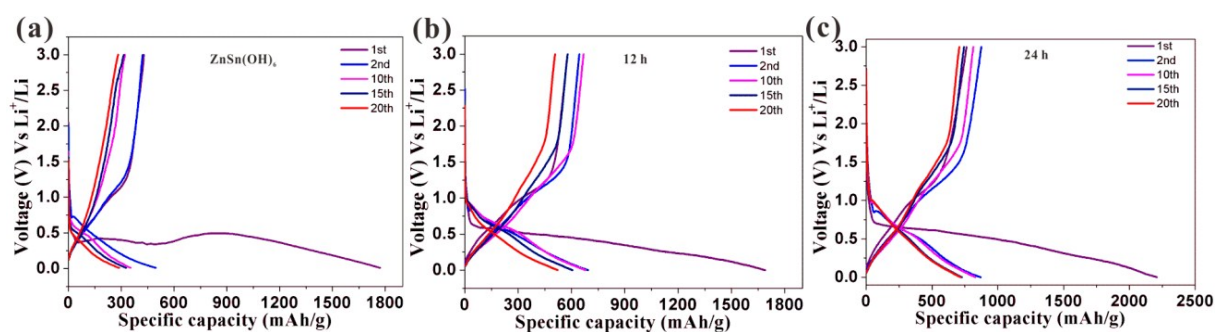

Fig. S1 Galvanostatic discharge-charge curves of three different samples at a rate of  $100 \text{ mA g}^{-1}$ : (a)  $\text{ZnSn}(\text{OH})_6$ ; (b) secondary-growth for 12 h; (c) secondary-growth for 24 h.
